# Supplementary material for: Influence of fake news in Twitter during the 2016 US presidential election
Source: PubMed Central journal article supplement (PMC6315042; doi:10.1038/s41467-018-07761-2), 2019-01-02
Supplement: 41467_2018_7761_MOESM3_ESM.pdf [file 41467_2018_7761_MOESM3_ESM.pdf]

# Influence of fake news in Twitter during the 2016 US presidential election

## Supplementary Information

Bovet et al.

### Supplementary Note 1

Breitbart News (extreme bias (right)) is the most dominant media outlet in term of number of tweets among the right end of the outlet categories with 1.8 million tweets (see Supplementary Table 1). Breitbart is closely aligned with the Trump campaign as Steve Bannon, who co-founded Breitbart, eventually joined Trump's campaign as its chief executive. We also consider separately the websites `shareblue.com` and `bluenationreview.com` in Supplementary Tables 2, 3, 4, 5 & 6 and Supplementary Fig. 1 as they were purchased by David Brock, a political operative of the Hillary Clinton campaign ([https://en.wikipedia.org/wiki/David\\_Brock](https://en.wikipedia.org/wiki/David_Brock)). We examine the relation between `breitbart.com`, `shareblue.com` and `bluenationreview.com` and the rest of with the extremely biased outlets in Supplementary Tables 2, 3, 4, 5 & 6 as well as Supplementary Fig. 1. For this analysis, outlets in the extreme bias (right) news category are split in two sub-categories: Breitbart and the rest of extreme bias (right) news (extreme bias (right)\breitbart). Extreme bias (left) news are also split in two sub-categories: Shareblue + Bluenationreview (SB+BNR) and the rest of extreme bias (left) news (extreme bias (left) \ (SB+BNR)). Our analysis re-reveals that, although Breitbart represents the largest tweet share of the extreme bias (right) category, the majority (66%) of users sharing links directing toward Breitbart also share links toward other websites of the extreme bias (right) category (Supplementary Table 3). We also find similar characteristics in term of average activity, retweet network structure, activity correlation and causal relations between Breitbart and the rest of the extreme bias (right) category. Removing Breitbart from the extreme bias category and treating it as a separated category does not change our results significantly. Concerning `shareblue.com` and `bluenationreview.com`, we find that they form a minority group of the extreme bias (left) category with a strong overlap (69%) of users with the rest of the extreme bias (left) category and that our results are not changed significantly when we consider them as a separated category.

### Supplementary Note 2

We observe the presence of several member of the campaign staffs of each candidate in the top news spreaders. We report the ranking in each news categories of campaign staffers among the top 100 news spreaders in Supplementary Table 9. We see more users linked to the campaign staff of Donald Trump (13) than to the campaign staff of Hillary Clinton (3). We also see that Trump staffers have higher ranks in term of influence and cover a broader spectrum of media categories (fake news (3), extreme bias (right) (9), right (9), right leaning (8), center (8) and left leaning (1)) than Clinton staffers (center (1), left leaning (2), left (1) and extreme bias (left) (1)). This reveals that the Trump team played an important direct role in the diffusion of news in Twitter. Although members of the Trump team are prevalent in the top spreaders of fake, extremely biased (right), right and right leaning news, the causal analysis reveals that they are not driving the activity of Trump

and Clinton supporters which is more importantly influenced by the top center and left leaning spreaders, consisting mainly of journalists. To verify the importance of users linked to the candidates' teams, we repeated the causal analysis after having removed all users linked to the campaigns. We report these results in Supplementary Fig. 4 and Supplementary Table 11. We observe no significant changes in the causal relations between the different groups as the relations are still dominated by center and left leaning top spreaders.

### Supplementary Note 3

A possible distinction between the diffusion mechanisms of different news outlets could be due to the fact that some websites aggregates news from other websites instead of producing news. We find four websites that, at least partly, aggregates news: `zerohedge.com` (fake news), `wnd.com` (extreme bias (right)), `realclearpolitics.com` (right leaning) and `truepundit.com` (extreme bias (right)). To understand if the presence of news aggregators in categories other than the center and left leaning could explain the difference in dynamics that we observe, we repeated our analysis of the dynamics after having removed the news aggregators from our dataset. We report the results in Supplementary Tables 12 and 13 and Supplementary Fig. 5. We observe no significant changes in the activity correlations and that without the news aggregators, the top fake news, extreme bias (right) and right leaning spreaders have a smaller causal effect on the other groups, while the left leaning and center influencers stay the dominant ones. This shows that news aggregators are not responsible for the differences on dynamics that we observe.

| fake news |                         |           | extreme bias (right) news |           | right news                   |           |
|-----------|-------------------------|-----------|---------------------------|-----------|------------------------------|-----------|
| hostnames | $N$                     | hostnames | $N$                       | hostnames | $N$                          |           |
| 1         | thegatewaypundit.com    | 761 756   | breitbart.com             | 1 854 920 | foxnews.com                  | 1 122 732 |
| 2         | truthfeed.com           | 554 955   | dailycaller.com           | 759 504   | dailymail.co.uk              | 474 846   |
| 3         | infowars.com            | 478 872   | americantinker.com        | 179 696   | washingtonexaminer.com       | 462 769   |
| 4         | therealstrategy.com     | 241 354   | wnd.com                   | 141 336   | nypost.com                   | 441 648   |
| 5         | conservativetribune.com | 212 273   | freebeacon.com            | 129 077   | bizpacreview.com             | 170 770   |
| 6         | zerohedge.com           | 186 706   | newsninja2012.com         | 127 251   | nationalreview.com           | 164 036   |
| 7         | rickwells.us            | 78 736    | hannity.com               | 114 221   | lifezette.com                | 139 257   |
| 8         | departed.co             | 72 773    | newsmax.com               | 94 882    | redstate.com                 | 105 912   |
| 9         | thepoliticalinsider.com | 66 426    | endingthefed.com          | 88 376    | allenbwest.com               | 104 857   |
| 10        | therightscoop.com       | 63 852    | truepundit.com            | 84 967    | theconservativetreehouse.com | 102 515   |
| 11        | teaparty.org            | 48 757    | westernjournalism.com     | 77 717    | townhall.com                 | 102 408   |
| 12        | usapoliticsnow.com      | 46 252    | dailywire.com             | 67 893    | investors.com                | 102 295   |
| 13        | clashdaily.com          | 45 970    | newsbusters.org           | 60 147    | theblaze.com                 | 99 029    |
| 14        | thefederalistpapers.org | 45 831    | ilovemyfreedom.org        | 54 772    | theamericanmirror.com        | 91 538    |
| 15        | redflagnews.com         | 45 423    | 100percentfedup.com       | 54 596    | ijr.com                      | 71 558    |
| 16        | thetruthdivision.com    | 44 486    | pjmedia.com               | 46 542    | judicialwatch.org            | 70 543    |
| 17        |                         |           | weaselzipppers.us         | 45 199    | thefederalist.com            | 55 835    |
| 18        |                         |           |                           |           | hotair.com                   | 55 431    |
| 19        |                         |           |                           |           | conservativeireview.com      | 54 307    |
| 20        |                         |           |                           |           | weeklystandard.com           | 50 707    |

| right leaning news |                       | center news |                     | left leaning news |                       |           |
|--------------------|-----------------------|-------------|---------------------|-------------------|-----------------------|-----------|
| hostnames          | $N$                   | hostnames   | $N$                 | hostnames         | $N$                   |           |
| 1                  | wsj.com               | 310 416     | cnn.com             | 2 291 736         | nytimes.com           | 1 811 627 |
| 2                  | washingtontimes.com   | 208 061     | thehill.com         | 1 200 123         | washingtonpost.com    | 1 640 088 |
| 3                  | rt.com                | 157 474     | politico.com        | 1 173 717         | abcnews.com           | 512 056   |
| 4                  | realclearpolitics.com | 128 417     | usatoday.com        | 326 198           | abcnews.go.com        | 467 533   |
| 5                  | telegraph.co.uk       | 82 118      | reuters.com         | 283 962           | theguardian.com       | 439 580   |
| 6                  | forbes.com            | 64 186      | bloomberg.com       | 266 662           | vox.com               | 369 789   |
| 7                  | fortune.com           | 57 644      | businessinsider.com | 239 423           | slate.com             | 279 438   |
| 8                  |                       |             | apnews.com          | 198 140           | buzzfeed.com          | 278 642   |
| 9                  |                       |             | observer.com        | 128 043           | cbsnews.com           | 232 889   |
| 10                 |                       |             | fivethirtyeight.com | 124 268           | politifact.com        | 198 095   |
| 11                 |                       |             | bbc.com             | 118 176           | latimes.com           | 190 994   |
| 12                 |                       |             | ibtimes.com         | 72 424            | nydailynews.com       | 188 769   |
| 13                 |                       |             | bbc.co.uk           | 71 941            | theatlantic.com       | 177 637   |
| 14                 |                       |             |                     |                   | mediaite.com          | 152 877   |
| 15                 |                       |             |                     |                   | newsweek.com          | 149 490   |
| 16                 |                       |             |                     |                   | npr.org               | 142 143   |
| 17                 |                       |             |                     |                   | independent.co.uk     | 127 689   |
| 18                 |                       |             |                     |                   | cnb.cx                | 87 094    |
| 19                 |                       |             |                     |                   | hollywoodreporter.com | 84 997    |

| left news |                       | extreme bias (left) news |                      |         |
|-----------|-----------------------|--------------------------|----------------------|---------|
| hostnames | $N$                   | hostnames                | $N$                  |         |
| 1         | huffingtonpost.com    | 1 057 518                | dailynewsbin.com     | 189 257 |
| 2         | thedailybeast.com     | 378 931                  | bipartisanreport.com | 119 857 |
| 3         | dailykos.com          | 324 351                  | bluenationreview.com | 75 455  |
| 4         | rawstory.com          | 297 256                  | crooksandliars.com   | 73 615  |
| 5         | politicususa.com      | 293 419                  | occupydemocrats.com  | 73 143  |
| 6         | time.com              | 252 468                  | shareblue.com        | 50 880  |
| 7         | motherjones.com       | 210 280                  | usuncut.com          | 27 653  |
| 8         | talkingpointsmemo.com | 199 346                  |                      |         |
| 9         | msnbc.com             | 177 090                  |                      |         |
| 10        | mashable.com          | 173 129                  |                      |         |
| 11        | salon.com             | 172 807                  |                      |         |
| 12        | thinkprogress.org     | 172 144                  |                      |         |
| 13        | newyorker.com         | 171 102                  |                      |         |
| 14        | mediamatters.org      | 152 160                  |                      |         |
| 15        | nymag.com             | 121 636                  |                      |         |
| 16        | theintercept.com      | 109 591                  |                      |         |
| 17        | thenation.com         | 54 661                   |                      |         |
| 18        | people.com            | 47 942                   |                      |         |

**Supplementary Table 1: Hostnames in each media category.** We also show the number ( $N$ ) of tweets with a URL pointing toward each hostname. Tweets with several URLs are counted multiple times.

|                                 | $N_t$     | $p_t$ | $N_u$   | $p_u$ | $N_t/N_u$ | $p_{t,n/o}$ | $p_{u,n/o}$ | $N_{t,n/o}/N_{u,n/o}$ |
|---------------------------------|-----------|-------|---------|-------|-----------|-------------|-------------|-----------------------|
| extreme bias (right) news       | 3 969 639 | 0.13  | 294 175 | 0.07  | 13.49     | 0.09        | 0.03        | 36.52                 |
| breitbart                       | 1 849 871 | 0.06  | 163 707 | 0.04  | 11.30     | 0.09        | 0.04        | 28.20                 |
| extreme bias (right) \breitbart | 2 119 876 | 0.07  | 238 517 | 0.05  | 8.89      | 0.10        | 0.03        | 26.95                 |
| extreme bias (left) news        | 609 503   | 0.02  | 99 743  | 0.02  | 6.11      | 0.06        | 0.03        | 11.46                 |
| SB+BNR                          | 126 191   | 0.00  | 28 888  | 0.01  | 4.37      | 0.04        | 0.03        | 5.11                  |
| extreme bias (left) \ (SB+BNR)  | 483 325   | 0.02  | 90 367  | 0.02  | 5.35      | 0.07        | 0.03        | 11.37                 |

**Supplementary Table 2: Tweet and user volume corresponding to extremely biased news in Twitter.** Number,  $N_t$ , and proportion,  $p_t$ , of tweets with a URL pointing to a website belonging to one of media categories. Number,  $N_u$ , and proportion,  $p_u$ , of users having sent the corresponding tweets, and average number of tweets per user,  $N_t/N_u$ , for each category. Proportion of tweets sent by non-official clients,  $p_{t,n/o}$ , proportion of users having sent at least one tweet from an non-official client,  $p_{u,n/o}$ , and average number of tweets per user sent from non-official clients,  $N_{t,n/o}/N_{u,n/o}$ . The average number of tweets per users and the proportion of tweets sent from unofficial clients are very similar for each sub-categories.

|                                 | extreme bias (right) | breitbart | extreme bias (right) \breitbart | extreme bias (left) | SB+BNR | extreme bias (left) \ (SB+BNR) |
|---------------------------------|----------------------|-----------|---------------------------------|---------------------|--------|--------------------------------|
| extreme bias (right)            | 1.00                 | 0.56      | 0.81                            | 0.06                | 0.03   | 0.06                           |
| breitbart                       | 0.56                 | 1.00      | 0.37                            | 0.06                | 0.02   | 0.06                           |
| extreme bias (right) \breitbart | 0.81                 | 0.37      | 1.00                            | 0.06                | 0.02   | 0.06                           |
| extreme bias (left)             | 0.06                 | 0.06      | 0.06                            | 1.00                | 0.29   | 0.91                           |
| SB+BNR                          | 0.03                 | 0.02      | 0.02                            | 0.29                | 1.00   | 0.20                           |
| extreme bias (left) \ (SB+BNR)  | 0.06                 | 0.06      | 0.06                            | 0.91                | 0.20   | 1.00                           |

**Supplementary Table 3: Jaccard indices between the sets of users in the extremely biased news categories.** Jaccard indices between the sets of users tweeting URLs directing to extreme bias (right) news outlets, breitbart.com, extreme bias (right) minus breitbart.com (extreme bias (right) \breitbart), extreme bias (left) news outlets, shareblue.com and bluenationreview.com (SB+BNR), extreme bias (left) minus shareblue.com and bluenationreview.com (extreme bias (left) \ (SB+BNR)). The Jaccard index between two sets  $A$  and  $B$  is computed as  $J = A \cap B / A \cup B$ . Although breitbart represents the largest tweet share of the extreme bias (right) category, the majority (66%) of users sharing links directing toward breitbart also share links toward other websites of the extreme bias (right) category. Shareblue and bluenationreview form a minority group of the extreme bias (left) category with a strong overlap (69%) of users with the rest of the extreme bias (left) category.

|                                 | $N$ nodes | $N$ edges | $\langle k \rangle$ | $\sigma(k_{out}) / \langle k \rangle$ | $\sigma(k_{in}) / \langle k \rangle$ | $\max(k_{out})$ | $\max(k_{in})$ |
|---------------------------------|-----------|-----------|---------------------|---------------------------------------|--------------------------------------|-----------------|----------------|
| extreme bias (right)            | 249 659   | 1 637 927 | 6.56                | $36 \pm 6$                            | $2.73 \pm 0.03$                      | 51 845          | 588            |
| breitbart                       | 141 924   | 795 504   | 5.61                | $31 \pm 6$                            | $2.33 \pm 0.02$                      | 41 039          | 376            |
| extreme bias (right) \breitbart | 201 563   | 940 161   | 4.66                | $43 \pm 8$                            | $2.28 \pm 0.03$                      | 51 845          | 562            |
| extreme bias (left)             | 78 911    | 277 483   | 3.52                | $33 \pm 6$                            | $2.49 \pm 0.08$                      | 23 168          | 648            |
| SB+BNR                          | 25 956    | 59 515    | 2.29                | $45 \pm 6$                            | $1.34 \pm 0.01$                      | 15 544          | 65             |
| extreme bias (left) \ (SB+BNR)  | 70 405    | 223 532   | 3.17                | $31 \pm 8$                            | $2.4 \pm 0.1$                        | 23 168          | 648            |

**Supplementary Table 4: Retweet networks characteristics for extremely biased news categories.** We show the number of nodes and edges (links) of the networks, the average degree,  $\langle k \rangle = \langle k_{in} \rangle = \langle k_{out} \rangle$ , (the in-/out-degree of a node is the number of in-going/out-going links attached to it). The out-degree of a node, i.e. a user, is equal to the number of different users that have retweeted at least one of her/his tweets. Its in-degree represents the number of different users she/he retweeted. The ratio of the standard deviation and the average of the in- and out-degree distribution,  $\sigma(k_{in}) / \langle k \rangle$  and  $\sigma(k_{out}) / \langle k \rangle$ , measures the heterogeneity of the connectivity of each networks. As the standard deviation of heavy-tailed degree distributions can depend on the network size, we computed the values of  $\sigma(k_{in}) / \langle k \rangle$  and  $\sigma(k_{out}) / \langle k \rangle$  with a bootstrap procedure. The average degree and the heterogeneity of the degree distributions are similar for each sub-categories.

|                                 | fake news | breitbart | extreme bias (right) \breitbart | right | right leaning | pro-Trump | center | left leaning | left | SB+BNR | extreme bias (left) \((SB+BNR) | pro-Clinton |
|---------------------------------|-----------|-----------|---------------------------------|-------|---------------|-----------|--------|--------------|------|--------|--------------------------------|-------------|
| fake news                       | 1.00      | 0.40      | 0.44                            | 0.49  | 0.41          | 0.54      | 0.34   | 0.34         | 0.39 | 0.13   | 0.30                           | 0.34        |
| breitbart                       | 0.40      | 1.00      | 0.36                            | 0.35  | 0.28          | 0.40      | 0.27   | 0.30         | 0.32 | 0.11   | 0.28                           | 0.29        |
| extreme bias (right) \breitbart | 0.44      | 0.36      | 1.00                            | 0.49  | 0.29          | 0.47      | 0.28   | 0.28         | 0.35 | 0.11   | 0.26                           | 0.27        |
| right                           | 0.49      | 0.35      | 0.49                            | 1.00  | 0.37          | 0.57      | 0.37   | 0.37         | 0.42 | 0.12   | 0.33                           | 0.36        |
| right leaning                   | 0.41      | 0.28      | 0.29                            | 0.37  | 1.00          | 0.42      | 0.36   | 0.32         | 0.35 | 0.15   | 0.23                           | 0.36        |
| pro-Trump                       | 0.54      | 0.40      | 0.47                            | 0.57  | 0.42          | 1.00      | 0.58   | 0.61         | 0.59 | 0.18   | 0.39                           | 0.73        |
| center                          | 0.34      | 0.27      | 0.28                            | 0.37  | 0.36          | 0.58      | 1.00   | 0.60         | 0.55 | 0.20   | 0.30                           | 0.65        |
| left leaning                    | 0.34      | 0.30      | 0.28                            | 0.37  | 0.32          | 0.61      | 0.60   | 1.00         | 0.63 | 0.23   | 0.36                           | 0.73        |
| left                            | 0.39      | 0.32      | 0.35                            | 0.42  | 0.35          | 0.59      | 0.55   | 0.63         | 1.00 | 0.20   | 0.38                           | 0.68        |
| SB+BNR                          | 0.13      | 0.11      | 0.11                            | 0.12  | 0.15          | 0.18      | 0.20   | 0.23         | 0.20 | 1.00   | 0.15                           | 0.20        |
| extreme bias (left) \((SB+BNR)  | 0.30      | 0.28      | 0.26                            | 0.33  | 0.23          | 0.39      | 0.30   | 0.36         | 0.38 | 0.15   | 1.00                           | 0.35        |
| pro-Clinton                     | 0.34      | 0.29      | 0.27                            | 0.36  | 0.36          | 0.73      | 0.65   | 0.73         | 0.68 | 0.20   | 0.35                           | 1.00        |

**Supplementary Table 5: Pearson correlation coefficient between the activity corresponding to different media categories.** The correlation profile of breitbart and extreme bias (left) minus breitbart are very similar. Extreme bias (left) minus breitbart has a slightly higher correlation with the right new and with the pro-Trump supporters than breitbart alone. SB+BNR has a relatively different correlation profile than extreme bias (left) minus SB+BNR, as it is poorly correlated with all of other categories.

| ↙                                   | pro-Clinton   | pro-Trump     | fake news     | breitbart       | extreme bias<br>(right) \ breitbart | right         |
|-------------------------------------|---------------|---------------|---------------|-----------------|-------------------------------------|---------------|
| pro-Clinton                         | 0.65 ± 0.01   | 0.14 ± 0.01   | 0.007 ± 0.008 | 0.0004 ± 0.0003 | 0.0008 ± 0.0010                     | 0.005 ± 0.007 |
| pro-Trump                           | 0.13 ± 0.02   | 0.45 ± 0.01   | 0.004 ± 0.005 | 0.000 ± 0.001   | 0.0003 ± 0.0004                     | 0.002 ± 0.005 |
| fake news                           | 0.021 ± 0.004 | 0.10 ± 0.01   | 0.15 ± 0.01   | 0.02 ± 0.01     | 0.06 ± 0.01                         | 0.01 ± 0.01   |
| breitbart                           | 0.05 ± 0.01   | 0.06 ± 0.01   | 0.03 ± 0.01   | 0.20 ± 0.02     | 0.05 ± 0.01                         | 0.02 ± 0.01   |
| extreme bias<br>(right) \ breitbart | 0.015 ± 0.009 | 0.005 ± 0.002 | 0.01 ± 0.01   | 0.04 ± 0.01     | 0.23 ± 0.01                         | 0.05 ± 0.01   |
| right                               | 0.019 ± 0.008 | 0.027 ± 0.009 | 0.03 ± 0.01   | 0.03 ± 0.02     | 0.04 ± 0.01                         | 0.17 ± 0.01   |
| right leaning                       | 0.016 ± 0.008 | 0.020 ± 0.009 | 0.02 ± 0.01   | 0.01 ± 0.02     | 0.03 ± 0.01                         | 0.06 ± 0.01   |
| center                              | 0.03 ± 0.01   | 0.011 ± 0.006 | 0.022 ± 0.007 | 0.0017 ± 0.0007 | 0.0024 ± 0.0008                     | 0.011 ± 0.007 |
| left leaning                        | 0.04 ± 0.01   | 0.007 ± 0.003 | 0.004 ± 0.002 | 0.0024 ± 0.0008 | 0.0023 ± 0.0008                     | 0.011 ± 0.007 |
| left                                | 0.03 ± 0.01   | 0.03 ± 0.01   | 0.010 ± 0.008 | 0.0024 ± 0.0010 | 0.0031 ± 0.0009                     | 0.009 ± 0.008 |
| (SB+BNR)                            | 0.09 ± 0.02   | 0.012 ± 0.002 | 0.023 ± 0.008 | 0.025 ± 0.008   | 0.03 ± 0.01                         | 0.003 ± 0.001 |
| extreme bias<br>(left) \ (SB+BNR)   | 0.09 ± 0.02   | 0.03 ± 0.01   | 0.02 ± 0.01   | 0.04 ± 0.01     | 0.027 ± 0.008                       | 0.003 ± 0.001 |

| ↙                                   | right leaning   | center        | left leaning  | left            | (SB+BNR)      | extreme bias<br>(left) \ (SB+BNR) |
|-------------------------------------|-----------------|---------------|---------------|-----------------|---------------|-----------------------------------|
| pro-Clinton                         | 0.001 ± 0.001   | 0.046 ± 0.007 | 0.063 ± 0.008 | 0.04 ± 0.01     | 0.037 ± 0.009 | 0.016 ± 0.006                     |
| pro-Trump                           | 0.0005 ± 0.0007 | 0.037 ± 0.008 | 0.034 ± 0.007 | 0.020 ± 0.007   | 0.008 ± 0.003 | 0.008 ± 0.005                     |
| fake news                           | 0.06 ± 0.01     | 0.026 ± 0.010 | 0.015 ± 0.003 | 0.013 ± 0.009   | 0.01 ± 0.01   | 0.02 ± 0.01                       |
| breitbart                           | 0.04 ± 0.01     | 0.042 ± 0.009 | 0.019 ± 0.002 | 0.004 ± 0.001   | 0.003 ± 0.001 | 0.042 ± 0.009                     |
| extreme bias<br>(right) \ breitbart | 0.06 ± 0.01     | 0.045 ± 0.009 | 0.030 ± 0.010 | 0.029 ± 0.009   | 0.03 ± 0.01   | 0.010 ± 0.009                     |
| right                               | 0.09 ± 0.01     | 0.043 ± 0.009 | 0.017 ± 0.003 | 0.0034 ± 0.0010 | 0.035 ± 0.008 | 0.002 ± 0.001                     |
| right leaning                       | 0.22 ± 0.01     | 0.044 ± 0.009 | 0.034 ± 0.009 | 0.0036 ± 0.0009 | 0.026 ± 0.008 | 0.0029 ± 0.0008                   |
| center                              | 0.009 ± 0.009   | 0.266 ± 0.009 | 0.18 ± 0.01   | 0.032 ± 0.009   | 0.014 ± 0.002 | 0.030 ± 0.009                     |
| left leaning                        | 0.003 ± 0.002   | 0.17 ± 0.01   | 0.291 ± 0.009 | 0.039 ± 0.010   | 0.043 ± 0.009 | 0.028 ± 0.008                     |
| left                                | 0.02 ± 0.01     | 0.08 ± 0.01   | 0.10 ± 0.01   | 0.16 ± 0.01     | 0.02 ± 0.01   | 0.06 ± 0.01                       |
| (SB+BNR)                            | 0.003 ± 0.001   | 0.028 ± 0.009 | 0.045 ± 0.010 | 0.03 ± 0.01     | 0.21 ± 0.01   | 0.06 ± 0.01                       |
| extreme bias<br>(left) \ (SB+BNR)   | 0.02 ± 0.01     | 0.026 ± 0.010 | 0.045 ± 0.008 | 0.034 ± 0.010   | 0.022 ± 0.009 | 0.25 ± 0.01                       |

**Supplementary Table 6: Maximum causal effect with Breitbart and SB+BNR separated.** Maximum causal effect values ( $\pm$  s.d.) between the activity of the top 100 spreaders of each media category and the candidate supporters when considering Breitbart and shareblue+bluationreview as separated from extreme bias (right) and extreme bias (left), respectively.

|                      | $N$ nodes | $N$ edges | $\langle k \rangle$ | $\sigma(k_{\text{out}})/\langle k \rangle$ | $\sigma(k_{\text{in}})/\langle k \rangle$ | $\max(k_{\text{out}})$ | $\max(k_{\text{in}})$ |
|----------------------|-----------|-----------|---------------------|--------------------------------------------|-------------------------------------------|------------------------|-----------------------|
| fake news            | 175 605   | 1 854 439 | 10.56               | $47 \pm 7$                                 | $3.18 \pm 0.06$                           | 104 840                | 1861                  |
| extreme bias (right) | 249 659   | 2 699 930 | 10.81               | $56 \pm 12$                                | $3.55 \pm 0.06$                           | 172 769                | 1712                  |
| right                | 345 644   | 2 799 298 | 8.10                | $63 \pm 20$                                | $3.57 \pm 0.08$                           | 243 101                | 1998                  |
| right leaning        | 216 026   | 611 563   | 2.83                | $55 \pm 14$                                | $2.33 \pm 0.08$                           | 53 248                 | 468                   |
| center               | 864 733   | 4 140 477 | 4.79                | $94 \pm 55$                                | $4.7 \pm 0.6$                             | 680 126                | 5703                  |
| left leaning         | 1 043 436 | 4 965 956 | 4.76                | $75 \pm 27$                                | $4.9 \pm 0.3$                             | 279 049                | 2547                  |
| left                 | 536 903   | 2 707 064 | 5.04                | $65 \pm 17$                                | $5.0 \pm 0.2$                             | 119 444                | 1830                  |
| extreme bias (left)  | 78 911    | 426 452   | 5.40                | $52 \pm 9$                                 | $3.27 \pm 0.08$                           | 50 415                 | 1003                  |

**Supplementary Table 7: Weighted retweet networks characteristics.** We show the number of nodes and edges (links) of the networks, the average degree,  $\langle k \rangle = \langle k_{\text{in}} \rangle = \langle k_{\text{out}} \rangle$ , (the in-/out-degree of a node is the number of in-going/out-going links attached to it). Here, the weight of a link represents the number of retweets from a user to another. In a directed network, the average in-degree and out-degree are always equal. The out-degree of a node, i.e. a user, is equal to the number of times other users have retweeted her/his tweets. Its in-degree represents the number of times she/he retweeted other users. The ratio of the standard deviation and the average of the in- and out-degree distribution,  $\sigma(k_{\text{in}})/\langle k \rangle$  and  $\sigma(k_{\text{out}})/\langle k \rangle$ , measures the heterogeneity of the connectivity of each networks. As the standard deviation of heavy-tailed degree distributions can depend on the network size, we computed the values of  $\sigma(k_{\text{in}})/\langle k \rangle$  and  $\sigma(k_{\text{out}})/\langle k \rangle$  with a bootstrap procedure.

|                                 | fake news | fake (no aggr.) | breitbart | extreme bias (right) | extreme bias (right no aggr.) | extreme bias (right) \breitbart | right | right leaning | right leaning (no aggr.) | center | left leaning | left | extreme bias (left) | extreme bias (left) \ (SB+BNR) | SB+BNR |
|---------------------------------|-----------|-----------------|-----------|----------------------|-------------------------------|---------------------------------|-------|---------------|--------------------------|--------|--------------|------|---------------------|--------------------------------|--------|
| fake news                       | 100       | 96              | 44        | 40                   | 40                            | 37                              | 31    | 24            | 20                       | 10     | 3            | 0    | 0                   | 0                              | 0      |
| fake (no aggr.)                 | 96        | 100             | 45        | 41                   | 41                            | 38                              | 30    | 23            | 20                       | 10     | 3            | 0    | 0                   | 0                              | 0      |
| breitbart                       | 44        | 45              | 100       | 73                   | 76                            | 46                              | 40    | 33            | 27                       | 15     | 3            | 0    | 0                   | 0                              | 0      |
| extreme bias (right)            | 40        | 41              | 73        | 100                  | 96                            | 72                              | 43    | 35            | 29                       | 16     | 3            | 0    | 0                   | 0                              | 0      |
| extreme bias (right no aggr.)   | 40        | 41              | 76        | 96                   | 100                           | 70                              | 44    | 36            | 30                       | 17     | 3            | 0    | 0                   | 0                              | 0      |
| extreme bias (right) \breitbart | 37        | 38              | 46        | 72                   | 70                            | 100                             | 39    | 30            | 28                       | 16     | 3            | 0    | 0                   | 0                              | 0      |
| right                           | 31        | 30              | 40        | 43                   | 44                            | 39                              | 100   | 36            | 31                       | 19     | 3            | 0    | 0                   | 0                              | 0      |
| right leaning                   | 24        | 23              | 33        | 35                   | 36                            | 30                              | 36    | 100           | 82                       | 22     | 4            | 2    | 0                   | 0                              | 0      |
| right leaning (no aggr.)        | 20        | 20              | 27        | 29                   | 30                            | 28                              | 31    | 82            | 100                      | 23     | 5            | 3    | 1                   | 0                              | 1      |
| center                          | 10        | 10              | 15        | 16                   | 17                            | 16                              | 19    | 22            | 23                       | 100    | 18           | 9    | 1                   | 0                              | 2      |
| left leaning                    | 3         | 3               | 3         | 3                    | 3                             | 3                               | 3     | 4             | 5                        | 18     | 100          | 14   | 1                   | 0                              | 2      |
| left                            | 0         | 0               | 0         | 0                    | 0                             | 0                               | 0     | 2             | 3                        | 9      | 14           | 100  | 16                  | 14                             | 13     |
| extreme bias (left)             | 0         | 0               | 0         | 0                    | 0                             | 0                               | 0     | 0             | 1                        | 1      | 1            | 16   | 100                 | 81                             | 42     |
| extreme bias (left) \ (SB+BNR)  | 0         | 0               | 0         | 0                    | 0                             | 0                               | 0     | 0             | 0                        | 0      | 0            | 14   | 81                  | 100                            | 26     |
| SB+BNR                          | 0         | 0               | 0         | 0                    | 0                             | 0                               | 0     | 0             | 1                        | 2      | 2            | 13   | 42                  | 26                             | 100    |

**Supplementary Table 8: Intersection between sets of the top 100 news spreaders from each media category.** We observe that the set of top 100 influencers does not change greatly when removing the news aggregators. The sets of top 100 fake news and fake news without aggregators influencers have 96 influencers in common. Their are also 96 influencers in common in the top 100 sets of extreme bias (right) and extreme bias (right) without aggregators. The right leaning and right leaning without aggregators top 100 influencers see the largest change, but still have 82 influencers in common.

|                      | fake news<br>fake | extreme bias<br>(right) | right | lean<br>right | center | lean<br>left | left | extreme bias<br>(left) |
|----------------------|-------------------|-------------------------|-------|---------------|--------|--------------|------|------------------------|
| @realDonaldTrump (T) | 5                 | 1                       | 2     | 4             | 28     | 53           |      |                        |
| @DonaldJTrumpJr (T)  | 14                | 12                      | 25    | 62            | 84     |              |      |                        |
| @DanScavino (T)      | 73                | 20                      | 36    | 16            | 76     |              |      |                        |
| @BreitbartNews (T)   |                   | 3                       |       |               |        |              |      |                        |
| @EricTrump (T)       |                   | 45                      | 31    |               |        |              |      |                        |
| @TeamTrump (T)       |                   | 16                      | 17    | 9             | 34     |              |      |                        |
| @PaulManafort (T)    |                   | 59                      | 45    | 17            | 82     |              |      |                        |
| @KellyannePolls (T)  |                   | 19                      | 13    | 8             | 20     |              |      |                        |
| @JasonMillerinDC (T) |                   | 60                      | 26    | 15            | 43     |              |      |                        |
| @seanspicer (T)      |                   |                         | 80    | 38            | 83     |              |      |                        |
| @RealBenCarson (T)   |                   |                         |       |               |        |              |      |                        |
| @BreitbartXM (T)     |                   | 65                      |       |               |        |              |      |                        |
| @BreitbartTech (T)   |                   | 87                      |       |               |        |              |      |                        |
| @HillaryClinton (C)  |                   |                         |       |               | 67     | 17           | 51   |                        |
| @JesseLehrich (C)    |                   |                         |       |               |        | 85           |      |                        |
| @Shareblue (C)       |                   |                         |       |               |        |              |      | 6                      |

**Supplementary Table 9: Collective influence ranking of Twitter users linked to the campaign staffs.** Influence ranking of users in the campaign staffs of Donald Trump (T) and Hillary Clinton (C) among the top 100 news spreaders of each media category. Based on <http://www.p2016.org/trump/trumporggen.html> and <http://www.p2016.org/clinton/clintonorggen.html>. We consider accounts related to Breitbart.com to be linked to the Trump team because of Steve Bannon who co-founded Breitbart and was chief executive of Donald Trump’s presidential campaign ([https://en.wikipedia.org/wiki/Steve\\_Bannon](https://en.wikipedia.org/wiki/Steve_Bannon)). We consider @Shareblue to be linked to Clinton team because of David Brock, a political operative of the Hillary Clinton campaign who purchased Shareblue ([https://en.wikipedia.org/wiki/David\\_Brock](https://en.wikipedia.org/wiki/David_Brock)).



|                      | fake news | extreme bias (right) | right | right leaning | center | left leaning | left | extreme bias (left) | pro-Trump | pro-Clinton |
|----------------------|-----------|----------------------|-------|---------------|--------|--------------|------|---------------------|-----------|-------------|
| fake news            | 1.00      | 0.50                 | 0.49  | 0.41          | 0.34   | 0.34         | 0.39 | 0.30                | 0.54      | 0.34        |
| extreme bias (right) | 0.50      | 1.00                 | 0.52  | 0.34          | 0.34   | 0.36         | 0.41 | 0.32                | 0.53      | 0.34        |
| right                | 0.49      | 0.52                 | 1.00  | 0.37          | 0.37   | 0.37         | 0.42 | 0.32                | 0.57      | 0.36        |
| right leaning        | 0.41      | 0.34                 | 0.37  | 1.00          | 0.36   | 0.32         | 0.35 | 0.26                | 0.42      | 0.36        |
| center               | 0.34      | 0.34                 | 0.37  | 0.36          | 1.00   | 0.60         | 0.55 | 0.34                | 0.58      | 0.65        |
| left leaning         | 0.34      | 0.36                 | 0.37  | 0.32          | 0.60   | 1.00         | 0.63 | 0.40                | 0.61      | 0.73        |
| left                 | 0.39      | 0.41                 | 0.42  | 0.35          | 0.55   | 0.63         | 1.00 | 0.41                | 0.59      | 0.68        |
| extreme bias (left)  | 0.30      | 0.32                 | 0.32  | 0.26          | 0.34   | 0.40         | 0.41 | 1.00                | 0.41      | 0.38        |
| pro-Trump            | 0.54      | 0.53                 | 0.57  | 0.42          | 0.58   | 0.61         | 0.59 | 0.41                | 1.00      | 0.73        |
| pro-Clinton          | 0.34      | 0.34                 | 0.36  | 0.36          | 0.65   | 0.73         | 0.68 | 0.38                | 0.73      | 1.00        |

**Supplementary Table 10: Pearson correlation coefficient between the activity corresponding to each media categories.**

| ↙                    | pro-Clinton   | pro-Trump     | fake news<br>no staff | extreme bias (right)<br>no staff | right<br>no staff |
|----------------------|---------------|---------------|-----------------------|----------------------------------|-------------------|
| pro-Clinton          | 0.65 ± 0.01   | 0.14 ± 0.01   | 0.003 ± 0.006         | 0.010 ± 0.008                    | 0.011 ± 0.008     |
| pro-Trump            | 0.12 ± 0.02   | 0.45 ± 0.01   | 0.001 ± 0.002         | 0.0010 ± 0.0006                  | 0.002 ± 0.001     |
| fake news            | 0.018 ± 0.003 | 0.10 ± 0.01   | 0.15 ± 0.01           | 0.04 ± 0.02                      | 0.03 ± 0.01       |
| extreme bias (right) | 0.03 ± 0.01   | 0.008 ± 0.003 | 0.03 ± 0.01           | 0.18 ± 0.02                      | 0.047 ± 0.010     |
| right                | 0.009 ± 0.002 | 0.006 ± 0.002 | 0.03 ± 0.01           | 0.04 ± 0.01                      | 0.20 ± 0.01       |
| right leaning        | 0.019 ± 0.008 | 0.040 ± 0.008 | 0.02 ± 0.01           | 0.02 ± 0.01                      | 0.08 ± 0.01       |
| center               | 0.03 ± 0.01   | 0.013 ± 0.009 | 0.012 ± 0.008         | 0.0010 ± 0.0006                  | 0.007 ± 0.010     |
| left leaning         | 0.04 ± 0.01   | 0.008 ± 0.005 | 0.002 ± 0.002         | 0.0006 ± 0.0005                  | 0.008 ± 0.008     |
| left                 | 0.07 ± 0.02   | 0.02 ± 0.01   | 0.019 ± 0.009         | 0.0026 ± 0.0009                  | 0.003 ± 0.002     |
| extreme bias (left)  | 0.07 ± 0.02   | 0.02 ± 0.01   | 0.03 ± 0.01           | 0.03 ± 0.01                      | 0.004 ± 0.001     |

  

| ↙                    | right leaning<br>no staff | center<br>no staff | left leaning<br>no staff | left<br>no staff | extreme bias (left)<br>no staff |
|----------------------|---------------------------|--------------------|--------------------------|------------------|---------------------------------|
| pro-Clinton          | 0.0009 ± 0.0010           | 0.054 ± 0.008      | 0.071 ± 0.008            | 0.013 ± 0.009    | 0.017 ± 0.008                   |
| pro-Trump            | 0.0005 ± 0.0005           | 0.016 ± 0.003      | 0.036 ± 0.007            | 0.027 ± 0.008    | 0.013 ± 0.006                   |
| fake news            | 0.06 ± 0.01               | 0.026 ± 0.009      | 0.014 ± 0.002            | 0.005 ± 0.001    | 0.029 ± 0.008                   |
| extreme bias (right) | 0.06 ± 0.01               | 0.039 ± 0.009      | 0.019 ± 0.003            | 0.030 ± 0.009    | 0.033 ± 0.008                   |
| right                | 0.09 ± 0.01               | 0.043 ± 0.009      | 0.018 ± 0.003            | 0.031 ± 0.009    | 0.033 ± 0.008                   |
| right leaning        | 0.23 ± 0.01               | 0.036 ± 0.009      | 0.031 ± 0.010            | 0.0032 ± 0.0010  | 0.0025 ± 0.0007                 |
| center               | 0.004 ± 0.009             | 0.261 ± 0.010      | 0.17 ± 0.01              | 0.018 ± 0.008    | 0.005 ± 0.009                   |
| left leaning         | 0.002 ± 0.002             | 0.138 ± 0.010      | 0.313 ± 0.009            | 0.015 ± 0.008    | 0.001 ± 0.001                   |
| left                 | 0.016 ± 0.008             | 0.07 ± 0.01        | 0.10 ± 0.01              | 0.16 ± 0.01      | 0.06 ± 0.01                     |
| extreme bias (left)  | 0.02 ± 0.01               | 0.023 ± 0.003      | 0.051 ± 0.008            | 0.03 ± 0.01      | 0.26 ± 0.01                     |

**Supplementary Table 11: Maximum causal effects without campaign staffers.** Maximum causal effect values ( $\pm$  s.d.) between the activity of the top 100 spreaders of each media category, where member of the staff of each candidate campaign (see Supplementary Table 9) are removed, and the activity of the presidential candidate supporters.

|                                       | fake news<br>(no aggregators) | extreme bias (right)<br>(no aggregators) | right | right leaning<br>(no aggregators) | center | left<br>leaning | left | extreme bias (left) | pro-Trump | pro-Clinton |
|---------------------------------------|-------------------------------|------------------------------------------|-------|-----------------------------------|--------|-----------------|------|---------------------|-----------|-------------|
| fake (no aggregators)                 | 1.00                          | 0.49                                     | 0.48  | 0.39                              | 0.33   | 0.34            | 0.38 | 0.29                | 0.53      | 0.33        |
| extreme bias (right) (no aggregators) | 0.49                          | 1.00                                     | 0.52  | 0.32                              | 0.34   | 0.35            | 0.41 | 0.31                | 0.52      | 0.33        |
| right                                 | 0.48                          | 0.52                                     | 1.00  | 0.35                              | 0.37   | 0.37            | 0.42 | 0.32                | 0.57      | 0.36        |
| right leaning (no aggregators)        | 0.39                          | 0.32                                     | 0.35  | 1.00                              | 0.35   | 0.31            | 0.34 | 0.25                | 0.41      | 0.35        |
| center                                | 0.33                          | 0.34                                     | 0.37  | 0.35                              | 1.00   | 0.60            | 0.55 | 0.34                | 0.58      | 0.65        |
| left leaning                          | 0.34                          | 0.35                                     | 0.37  | 0.31                              | 0.60   | 1.00            | 0.63 | 0.40                | 0.61      | 0.73        |
| left                                  | 0.38                          | 0.41                                     | 0.42  | 0.34                              | 0.55   | 0.63            | 1.00 | 0.41                | 0.59      | 0.68        |
| extreme bias (left)                   | 0.29                          | 0.31                                     | 0.32  | 0.25                              | 0.34   | 0.40            | 0.41 | 1.00                | 0.41      | 0.38        |
| pro-Trump                             | 0.53                          | 0.52                                     | 0.57  | 0.41                              | 0.58   | 0.61            | 0.59 | 0.41                | 1.00      | 0.73        |
| pro-Clinton                           | 0.33                          | 0.33                                     | 0.36  | 0.35                              | 0.65   | 0.73            | 0.68 | 0.38                | 0.73      | 1.00        |

**Supplementary Table 12: Pearson correlation coefficient between the activity corresponding to each media categories without the news aggregators.** We observe no significant changes in the correlation coefficients between the analysis with (Tab. 10) and without news aggregators. The maximum difference in correlation (0.02) is between the right leaning and extreme bias (right).

| ✓                               | pro-Clinton   | pro-Trump     | fake news<br>(no aggr.) | extreme bias<br>(right, no aggr.) | right           |
|---------------------------------|---------------|---------------|-------------------------|-----------------------------------|-----------------|
| pro-Clinton                     | 0.65 ± 0.01   | 0.14 ± 0.01   | 0.015 ± 0.005           | 0.0014 ± 0.0005                   | 0.003 ± 0.003   |
| pro-Trump                       | 0.13 ± 0.02   | 0.45 ± 0.01   | 0.010 ± 0.006           | 0.0011 ± 0.0005                   | 0.0010 ± 0.0005 |
| fake news (no aggr.)            | 0.05 ± 0.01   | 0.10 ± 0.01   | 0.14 ± 0.01             | 0.09 ± 0.01                       | 0.02 ± 0.01     |
| extreme bias (right) (no aggr.) | 0.03 ± 0.01   | 0.005 ± 0.003 | 0.03 ± 0.01             | 0.20 ± 0.01                       | 0.05 ± 0.01     |
| right                           | 0.023 ± 0.008 | 0.04 ± 0.01   | 0.02 ± 0.01             | 0.03 ± 0.01                       | 0.19 ± 0.01     |
| right leaning (no aggr.)        | 0.006 ± 0.002 | 0.002 ± 0.002 | 0.02 ± 0.01             | 0.012 ± 0.010                     | 0.05 ± 0.01     |
| center                          | 0.04 ± 0.01   | 0.026 ± 0.010 | 0.012 ± 0.007           | 0.0012 ± 0.0007                   | 0.015 ± 0.008   |
| left leaning                    | 0.04 ± 0.01   | 0.016 ± 0.005 | 0.003 ± 0.001           | 0.0006 ± 0.0004                   | 0.011 ± 0.007   |
| left                            | 0.06 ± 0.01   | 0.02 ± 0.01   | 0.013 ± 0.008           | 0.009 ± 0.009                     | 0.012 ± 0.009   |
| extreme bias (left)             | 0.09 ± 0.02   | 0.012 ± 0.009 | 0.04 ± 0.01             | 0.02 ± 0.01                       | 0.00 ± 0.01     |

  

| ✓                               | right leaning<br>(no aggr.) | center        | left leaning  | left          | extreme bias<br>(left) |
|---------------------------------|-----------------------------|---------------|---------------|---------------|------------------------|
| pro-Clinton                     | 0.006 ± 0.006               | 0.046 ± 0.007 | 0.065 ± 0.008 | 0.022 ± 0.009 | 0.006 ± 0.006          |
| pro-Trump                       | 0.002 ± 0.001               | 0.032 ± 0.007 | 0.015 ± 0.003 | 0.025 ± 0.007 | 0.013 ± 0.006          |
| fake news (no aggr.)            | 0.05 ± 0.01                 | 0.039 ± 0.009 | 0.013 ± 0.002 | 0.025 ± 0.008 | 0.028 ± 0.009          |
| extreme bias (right) (no aggr.) | 0.06 ± 0.01                 | 0.041 ± 0.009 | 0.017 ± 0.002 | 0.004 ± 0.001 | 0.030 ± 0.010          |
| right                           | 0.08 ± 0.01                 | 0.042 ± 0.009 | 0.018 ± 0.003 | 0.028 ± 0.009 | 0.034 ± 0.009          |
| right leaning (no aggr.)        | 0.29 ± 0.01                 | 0.036 ± 0.010 | 0.03 ± 0.01   | 0.016 ± 0.008 | 0.0022 ± 0.0009        |
| center                          | 0.005 ± 0.007               | 0.267 ± 0.009 | 0.18 ± 0.01   | 0.020 ± 0.009 | 0.021 ± 0.008          |
| left leaning                    | 0.002 ± 0.002               | 0.18 ± 0.01   | 0.300 ± 0.009 | 0.013 ± 0.008 | 0.013 ± 0.007          |
| left                            | 0.021 ± 0.008               | 0.07 ± 0.01   | 0.10 ± 0.01   | 0.162 ± 0.010 | 0.07 ± 0.01            |
| extreme bias (left)             | 0.010 ± 0.010               | 0.024 ± 0.004 | 0.05 ± 0.01   | 0.03 ± 0.01   | 0.26 ± 0.01            |

**Supplementary Table 13: Maximum causal effect without news aggregators.** Maximum causal effect values ( $\pm$  s.d.) between the activity of the top 100 spreaders of each media category, where news aggregators websites have removed, and the activity of the presidential candidate supporters. We see that our conclusions stay valid even without the news aggregators, namely the domination of center and left leaning influencers in term of causal effects. We observe a small decrease in the intensity of the causal effect of center influencers toward Clinton supporters (0.065 to 0.046), but the effect is still the second most important after the left leaning influencers. We also observe a small increase of the causal effect of Clinton supporters on the fake news top spreaders. Without the news aggregators, the top fake news, extreme bias (right) and right leaning spreaders have a smaller causal effect on the other groups.

| client name                 | number of tweets with a URL |
|-----------------------------|-----------------------------|
| Twitter for iPhone          | 14 215 411                  |
| Twitter Web Client          | 13 045 560                  |
| Twitter for Android         | 10 192 781                  |
| Twitter for iPad            | 3 355 197                   |
| Facebook                    | 1 254 619                   |
| TweetDeck                   | 1 079 637                   |
| Mobile Web (M5)             | 951 749                     |
| Mobile Web                  | 452 812                     |
| Google                      | 410 514                     |
| Twitter for Windows         | 200 088                     |
| Twitter for Windows Phone   | 170 529                     |
| Mobile Web (M2)             | 161 682                     |
| Twitter for BlackBerry      | 93 937                      |
| iOS                         | 72 334                      |
| Twitter for Android Tablets | 56 007                      |
| Twitter for Mac             | 43 993                      |
| OS X                        | 40 642                      |
| Twitter for BlackBerry®     | 25 140                      |

**Supplementary Table 14: List of Twitter official clients.** We also display the number of tweets containing a URL and originating from each official client. The number of tweets with a URL originating from official clients represent 82% of the total number of tweets with a URL.

---


$$\begin{aligned}
\mathcal{P}_0 &= (0_{t-1}, 1_{t-1}, 8_{t-1}, 7_{t-1}, 6_{t-1}, 9_{t-1}, 0_{t-2}, 1_{t-2}, 8_{t-2}, 6_{t-2}, 7_{t-2}, 0_{t-3}, 1_{t-3}, 8_{t-3}, 3_{t-3}, 2_{t-3}, 0_{t-4}, 1_{t-4}, 8_{t-4}, \\
&\quad 0_{t-5}, 1_{t-5}, 8_{t-5}, 0_{t-6}, 1_{t-6}, 8_{t-6}, 0_{t-7}, 1_{t-7}, 8_{t-7}, 0_{t-8}, 1_{t-8}, 8_{t-8}, 4_{t-8}, 0_{t-9}, 1_{t-9}, 8_{t-9}, 6_{t-9}, 4_{t-9}, 0_{t-10}, \\
&\quad 1_{t-10}, 6_{t-10}, 0_{t-11}, 1_{t-11}, 8_{t-11}, 0_{t-12}, 9_{t-12}, 1_{t-12}, 6_{t-12}, 0_{t-13}, 8_{t-13}, 1_{t-13}, 0_{t-14}, 1_{t-14}, 0_{t-15}, 0_{t-16}, 0_{t-17}, \\
&\quad 1_{t-17}, 0_{t-18}, 1_{t-18}) \\
\mathcal{P}_1 &= (1_{t-1}, 0_{t-1}, 9_{t-1}, 1_{t-2}, 0_{t-2}, 2_{t-2}, 6_{t-2}, 1_{t-3}, 0_{t-3}, 2_{t-3}, 8_{t-3}, 1_{t-4}, 0_{t-4}, 1_{t-5}, 0_{t-5}, 2_{t-5}, 8_{t-5}, 1_{t-6}, 0_{t-6}, \\
&\quad 1_{t-7}, 0_{t-7}, 1_{t-8}, 0_{t-8}, 1_{t-9}, 0_{t-9}, 1_{t-10}, 0_{t-10}, 1_{t-11}, 8_{t-11}, 0_{t-11}, 1_{t-12}, 7_{t-12}, 0_{t-12}, 1_{t-13}, 8_{t-13}, 0_{t-13}, 1_{t-14}, \\
&\quad 2_{t-14}, 1_{t-15}, 0_{t-15}, 0_{t-16}, 7_{t-16}, 6_{t-17}, 1_{t-17}, 0_{t-17}, 0_{t-18}, 1_{t-18}) \\
\mathcal{P}_2 &= (2_{t-1}, 5_{t-1}, 9_{t-1}, 3_{t-1}, 4_{t-1}, 6_{t-1}, 1_{t-1}, 2_{t-2}, 3_{t-2}, 9_{t-2}, 6_{t-2}, 1_{t-2}, 5_{t-2}, 2_{t-3}, 4_{t-3}, 1_{t-3}, 6_{t-3}, 3_{t-3}, 2_{t-4}, \\
&\quad 8_{t-4}, 1_{t-4}, 6_{t-5}, 5_{t-5}, 2_{t-5}, 2_{t-6}, 1_{t-6}, 5_{t-7}, 2_{t-8}, 8_{t-9}, 1_{t-9}, 6_{t-11}, 6_{t-13}, 2_{t-13}) \\
\mathcal{P}_3 &= (3_{t-1}, 5_{t-1}, 2_{t-1}, 4_{t-1}, 9_{t-1}, 6_{t-1}, 0_{t-1}, 3_{t-2}, 6_{t-2}, 5_{t-2}, 9_{t-2}, 2_{t-2}, 4_{t-2}, 4_{t-3}, 4_{t-4}, 0_{t-4}, 5_{t-5}, 6_{t-5}, 8_{t-6}, \\
&\quad 0_{t-7}, 4_{t-7}, 6_{t-11}, 6_{t-13}, 3_{t-17}, 5_{t-18}) \\
\mathcal{P}_4 &= (4_{t-1}, 5_{t-1}, 2_{t-1}, 3_{t-1}, 6_{t-1}, 9_{t-1}, 7_{t-1}, 4_{t-2}, 5_{t-2}, 3_{t-2}, 2_{t-2}, 4_{t-3}, 2_{t-3}, 4_{t-4}, 6_{t-5}, 4_{t-5}, 5_{t-5}, 1_{t-5}, 3_{t-6}, \\
&\quad 1_{t-8}, 2_{t-13}, 3_{t-17}) \\
\mathcal{P}_5 &= (5_{t-1}, 4_{t-1}, 2_{t-1}, 3_{t-1}, 7_{t-1}, 6_{t-1}, 5_{t-2}, 6_{t-2}, 2_{t-2}, 1_{t-2}, 3_{t-2}, 4_{t-3}, 5_{t-4}, 7_{t-4}, 6_{t-5}, 5_{t-5}, 2_{t-5}, 4_{t-6}, 0_{t-18}) \\
\mathcal{P}_6 &= (6_{t-1}, 7_{t-1}, 8_{t-1}, 0_{t-1}, 5_{t-1}, 1_{t-1}, 6_{t-2}, 7_{t-2}, 8_{t-2}, 9_{t-2}, 2_{t-2}, 6_{t-3}, 7_{t-3}, 8_{t-3}, 2_{t-3}, 1_{t-3}, 6_{t-4}, 7_{t-4}, 8_{t-4}, \\
&\quad 5_{t-4}, 6_{t-5}, 8_{t-5}, 4_{t-5}, 7_{t-5}, 6_{t-6}, 7_{t-6}, 8_{t-6}, 9_{t-6}, 5_{t-6}, 2_{t-6}, 6_{t-7}, 7_{t-7}, 7_{t-8}, 6_{t-8}, 2_{t-9}, 6_{t-10}, 8_{t-18}) \\
\mathcal{P}_7 &= (7_{t-1}, 6_{t-1}, 8_{t-1}, 0_{t-1}, 7_{t-2}, 6_{t-2}, 8_{t-2}, 6_{t-3}, 7_{t-3}, 8_{t-3}, 7_{t-4}, 6_{t-4}, 8_{t-4}, 7_{t-5}, 6_{t-5}, 4_{t-5}, 8_{t-5}, 8_{t-6}, 6_{t-6}, \\
&\quad 7_{t-6}, 6_{t-7}, 6_{t-8}, 6_{t-9}, 6_{t-10}, 7_{t-11}, 6_{t-17}) \\
\mathcal{P}_8 &= (8_{t-1}, 9_{t-1}, 7_{t-1}, 6_{t-1}, 8_{t-2}, 6_{t-2}, 7_{t-2}, 4_{t-2}, 5_{t-2}, 8_{t-3}, 6_{t-3}, 7_{t-3}, 9_{t-3}, 2_{t-3}, 0_{t-3}, 1_{t-3}, 7_{t-4}, 8_{t-4}, 6_{t-4}, \\
&\quad 9_{t-4}, 0_{t-4}, 7_{t-5}, 8_{t-5}, 2_{t-5}, 8_{t-6}, 5_{t-6}, 7_{t-6}, 6_{t-6}, 0_{t-6}, 7_{t-7}, 8_{t-7}, 9_{t-7}, 1_{t-7}, 6_{t-8}, 8_{t-8}, 8_{t-9}, 7_{t-11}, 6_{t-13}) \\
\mathcal{P}_9 &= (9_{t-1}, 8_{t-1}, 7_{t-1}, 5_{t-1}, 1_{t-1}, 0_{t-1}, 9_{t-2}, 8_{t-2}, 2_{t-2}, 6_{t-2}, 1_{t-2}, 9_{t-3}, 8_{t-3}, 2_{t-3}, 9_{t-4}, 8_{t-4}, 0_{t-4}, 2_{t-5}, 8_{t-5}, \\
&\quad 3_{t-5}, 5_{t-5}, 3_{t-6}, 9_{t-6}, 0_{t-6}, 8_{t-7}, 7_{t-7}, 0_{t-7}, 9_{t-8}, 6_{t-8}, 3_{t-8}, 0_{t-8}, 7_{t-11}, 1_{t-11}, 9_{t-12}, 3_{t-13}, 9_{t-13}, 2_{t-13}, 6_{t-14}, \\
&\quad 0_{t-14})
\end{aligned}$$


---

**Supplementary Table 15: Parents  $\mathcal{P}$  for each time series estimated with the causal discovery algorithm.**

0 stands for pro-Clinton, 1 for pro-Trump, 2 for top fake news spreaders, 3 for top extreme bias (right) spreaders, 4 for top right spreaders, 5 for top right leaning spreaders, 6 for top center spreaders, 7 for top left leaning spreaders, 8 for top left spreaders and 9 for top extreme bias (left) spreaders.

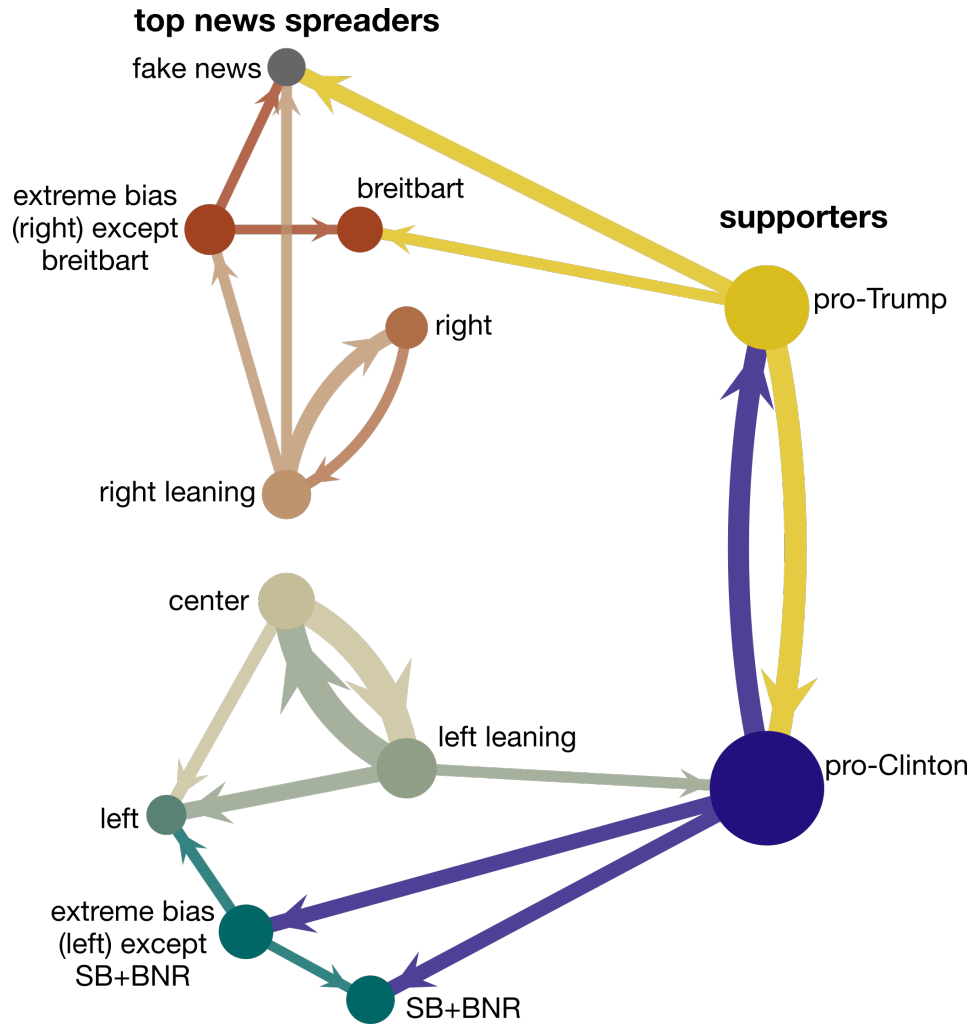

Supplementary Figure 1: Causal graph obtained when considering breitbart and share-blue+bluenationreview (SB+BNR) as separated from extreme bias (right) and extreme bias (left), respectively. We only show causal effects larger than 0.05.

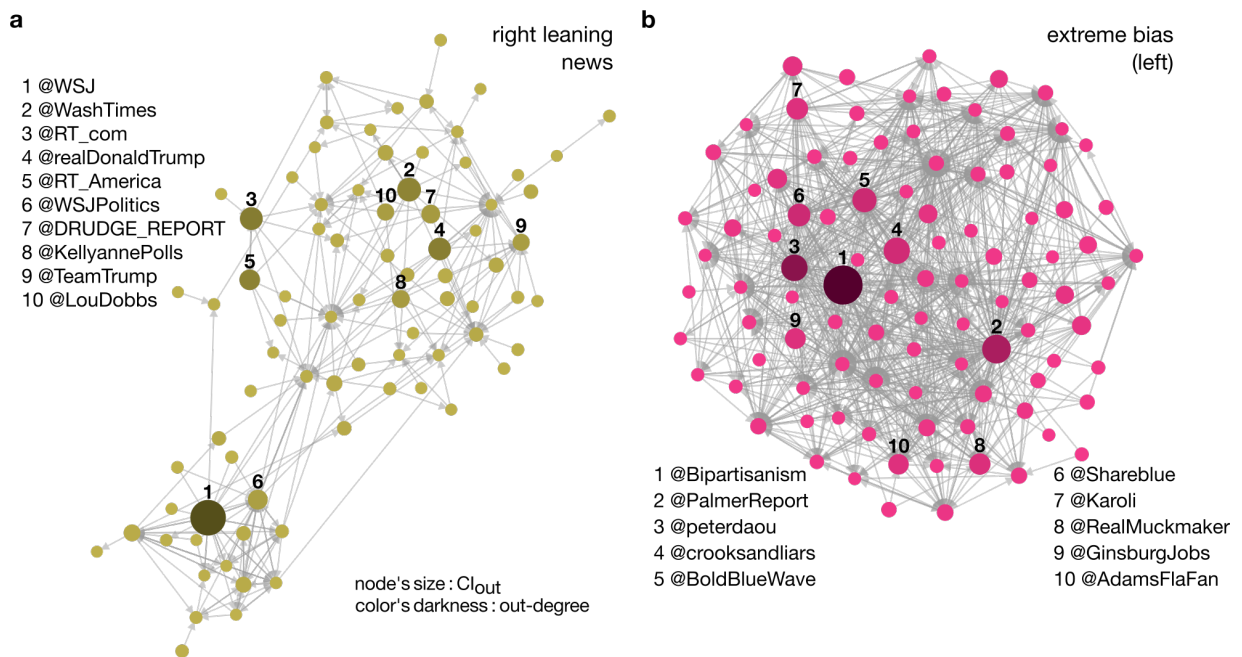

Supplementary Figure 2: Retweet networks formed by the top 100 influencers of right leaning (a) and extreme bias (left) news (b). The direction of the links represents the flow of information between users. The size of the nodes is proportional to their  $CI_{out}$  values and the shade of the nodes' color represents their out-degree from dark (high out-degree) to light (low out-degree).

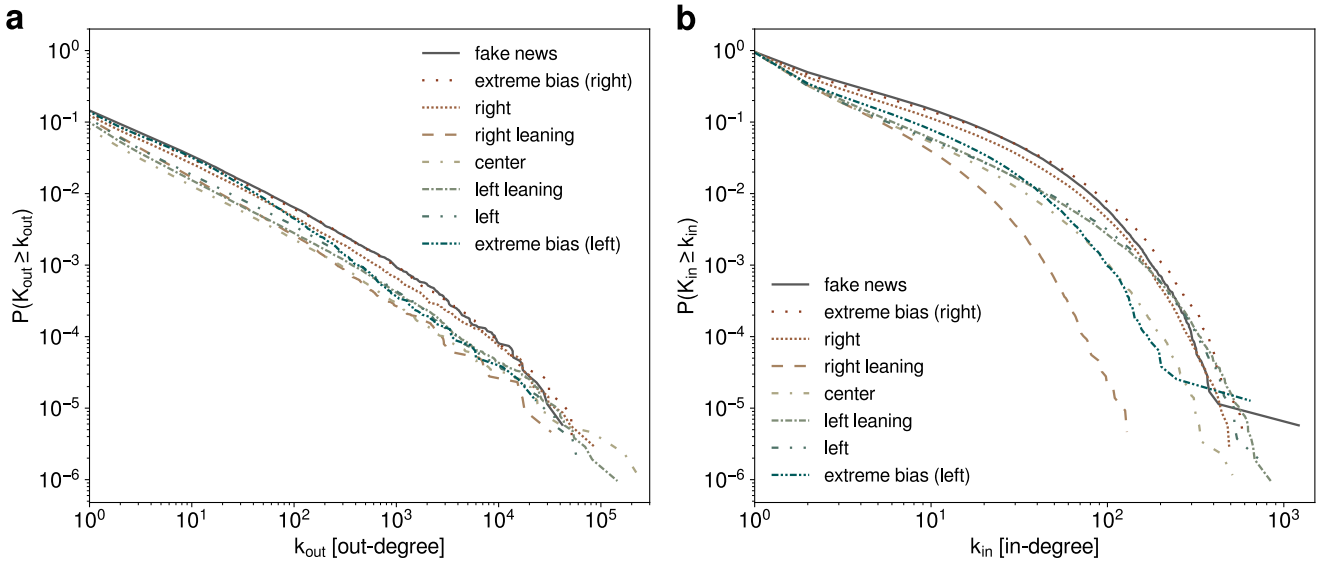

**Supplementary Figure 3: Empirical complementary cumulative distribution function (CCDF) of the out-degree (a) and in-degree (b) of the retweet networks for each media category.** The CCDF,  $P(K \geq k)$ , gives the probability that the in- (or out-) degree of a node is greater of equal to  $k$ . The out-degree of a node, i.e. a user, is equal to the number of different users that have retweeted at least one of her/his tweets with a URL directing to a news outlet. Its in-degree represents the number of different users she/he retweeted. The CCDF of the fake, extremely biased (right) and right networks are characterized by less steep slopes on the log-log plots than the other distributions, resulting in a larger average degree, thus indicating a wider diversity of attention from the audience of these news, i.e. they typically retweet more people and are retweeted by more people, than the audience of more traditional news.

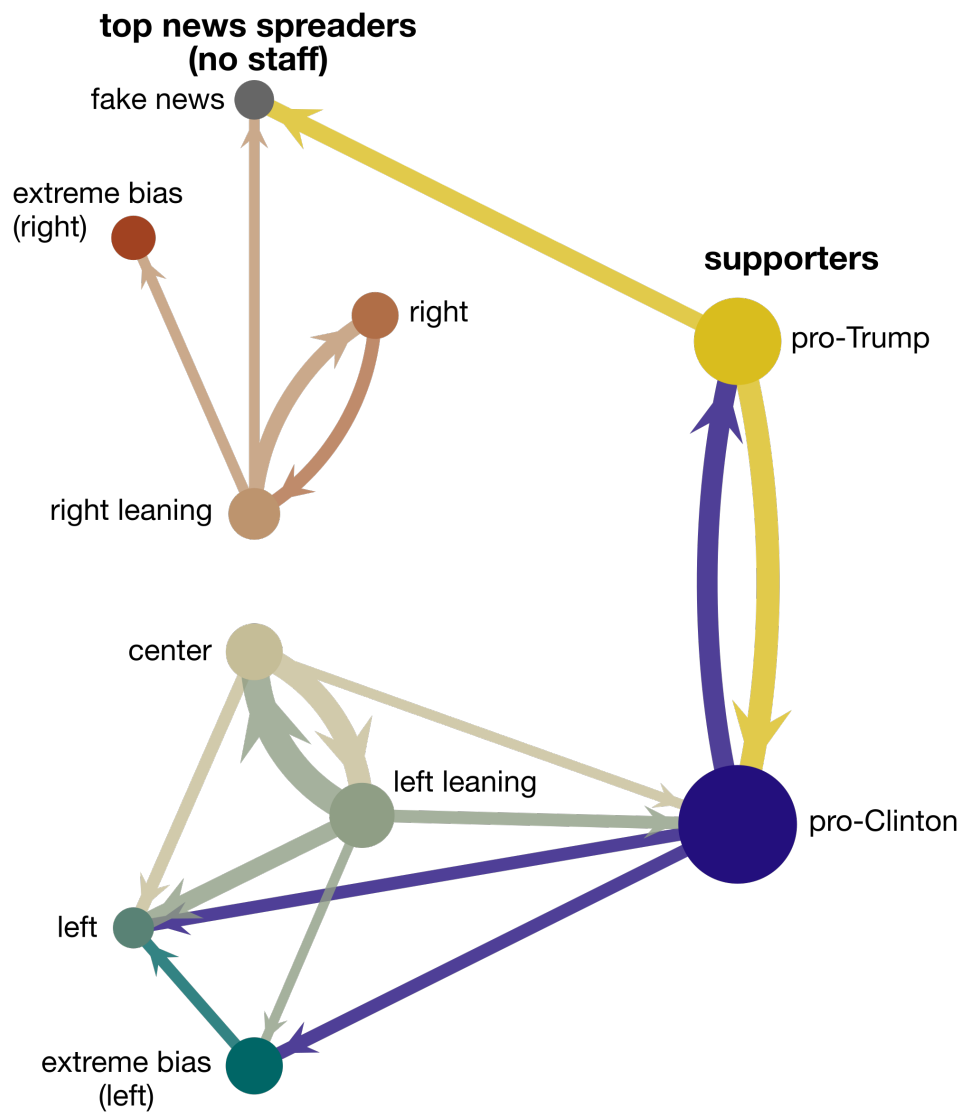

Supplementary Figure 4: Causal graph obtained after removing all users linked to the campaign staff of each candidate from the influencers. We only show causal effects larger than 0.05.



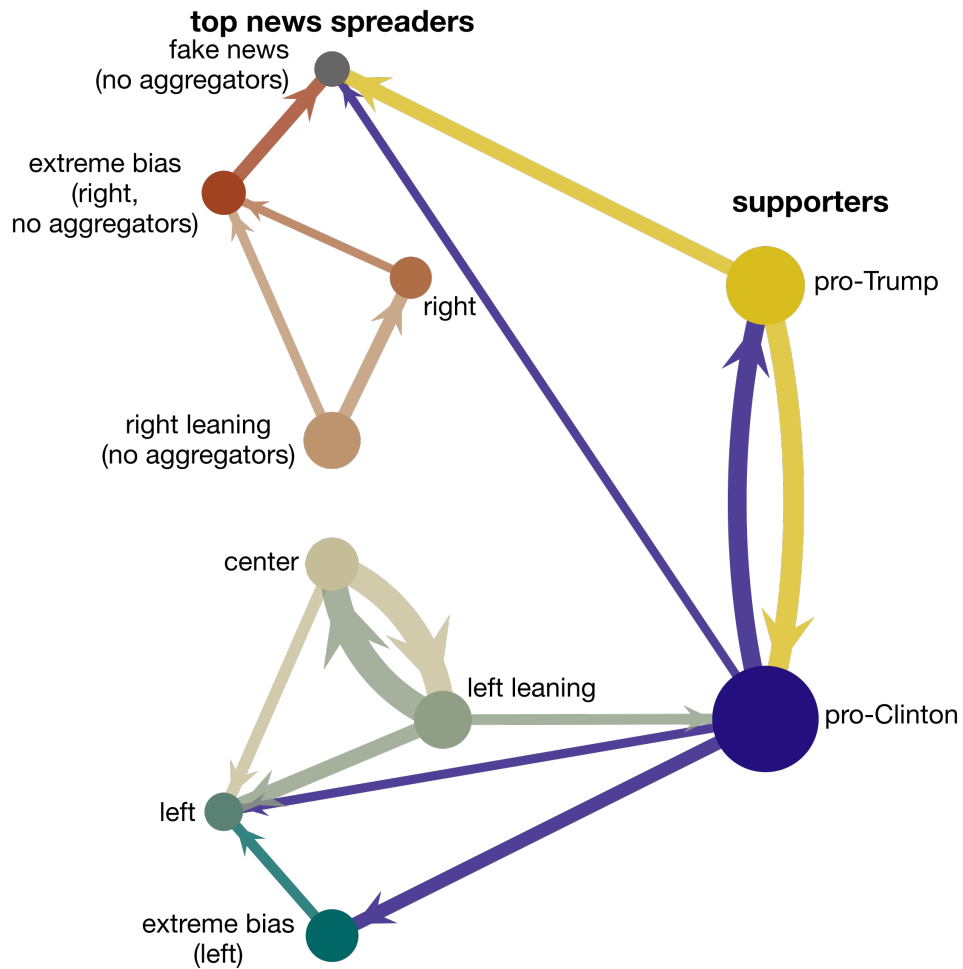

Supplementary Figure 5: Causal graph obtained after removing news aggregators websites. We only show causal effects larger than 0.05.

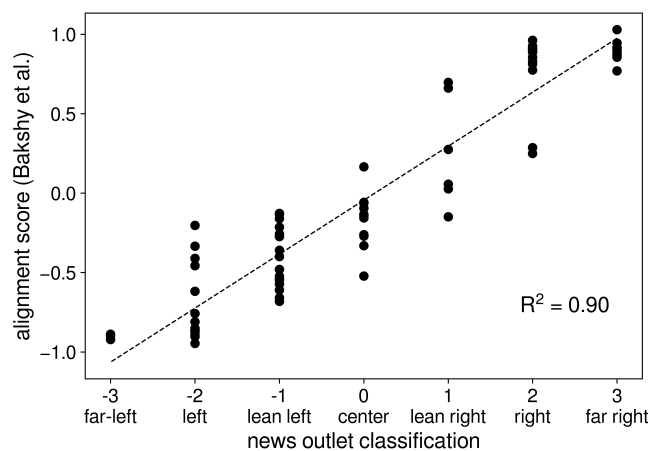

Supplementary Figure 6: Comparison of the news outlet political alignment we obtained with the results of [1].

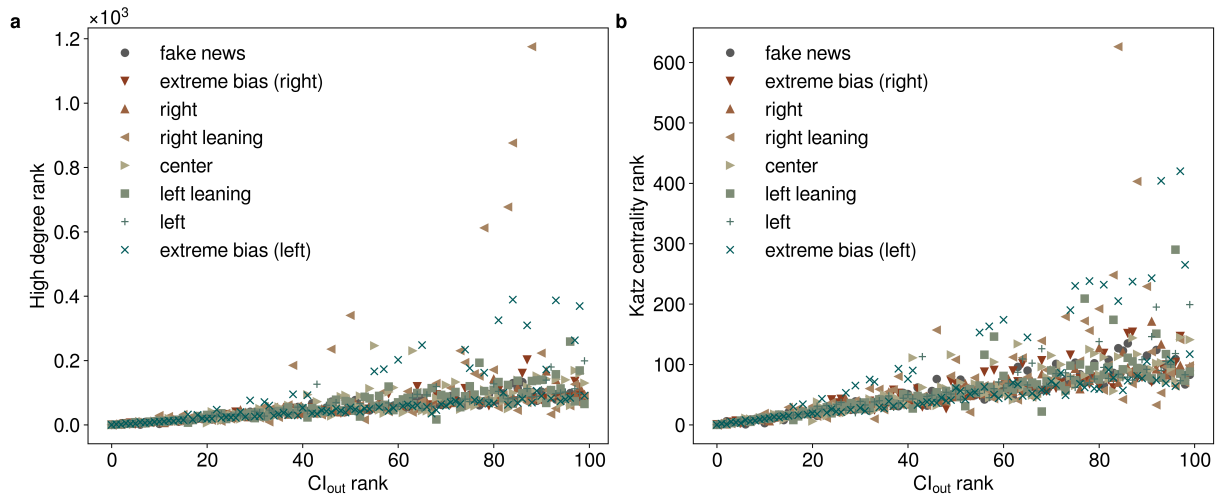

Supplementary Figure 7: Comparison of Collective Influence super-spreader ranking ( $CI_{out}$ ) with High degree ranking (a) and Katz centrality ranking (b).

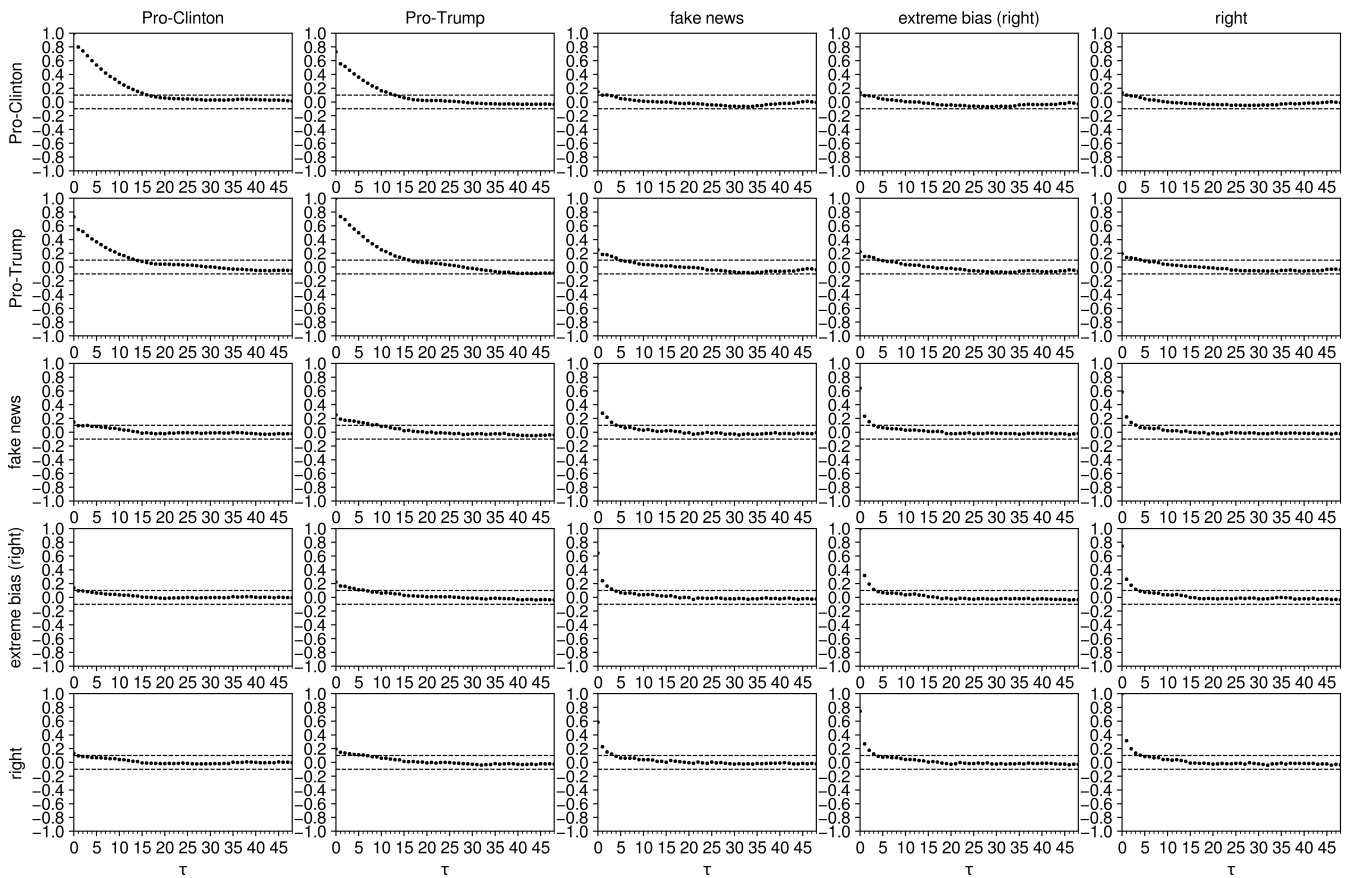

Supplementary Figure 8: Pairwise lagged correlations between the activity time series of top 100 influencers of fake, extreme bias (right) and right news as well as and Trump and Clinton supporters. The time lag,  $\tau$ , is expressed in data time points corresponding to 15 min interval. The horizontal dashed line represents a correlation value of 0.1 and -0.1.

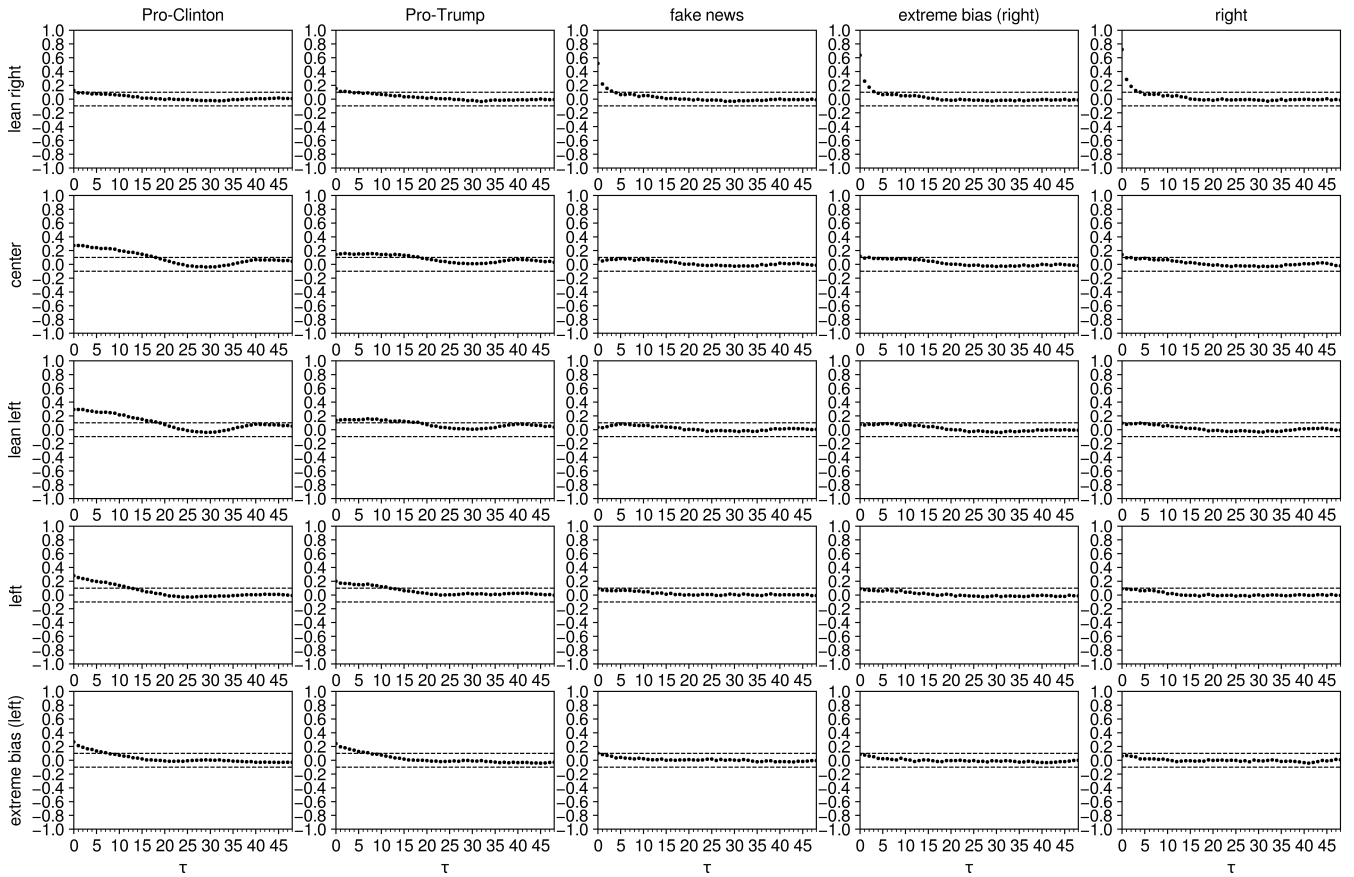

**Supplementary Figure 9: Pairwise lagged correlations between the activity time series of top 100 influencers of fake, extreme bias (right), right leaning, center, left leaning, left and extreme bias (left) news as well as and Trump and Clinton supporters. The time lag,  $\tau$ , is expressed in data time points corresponding to 15 min interval. The horizontal dashed line represents a correlation value of 0.1 and -0.1.**

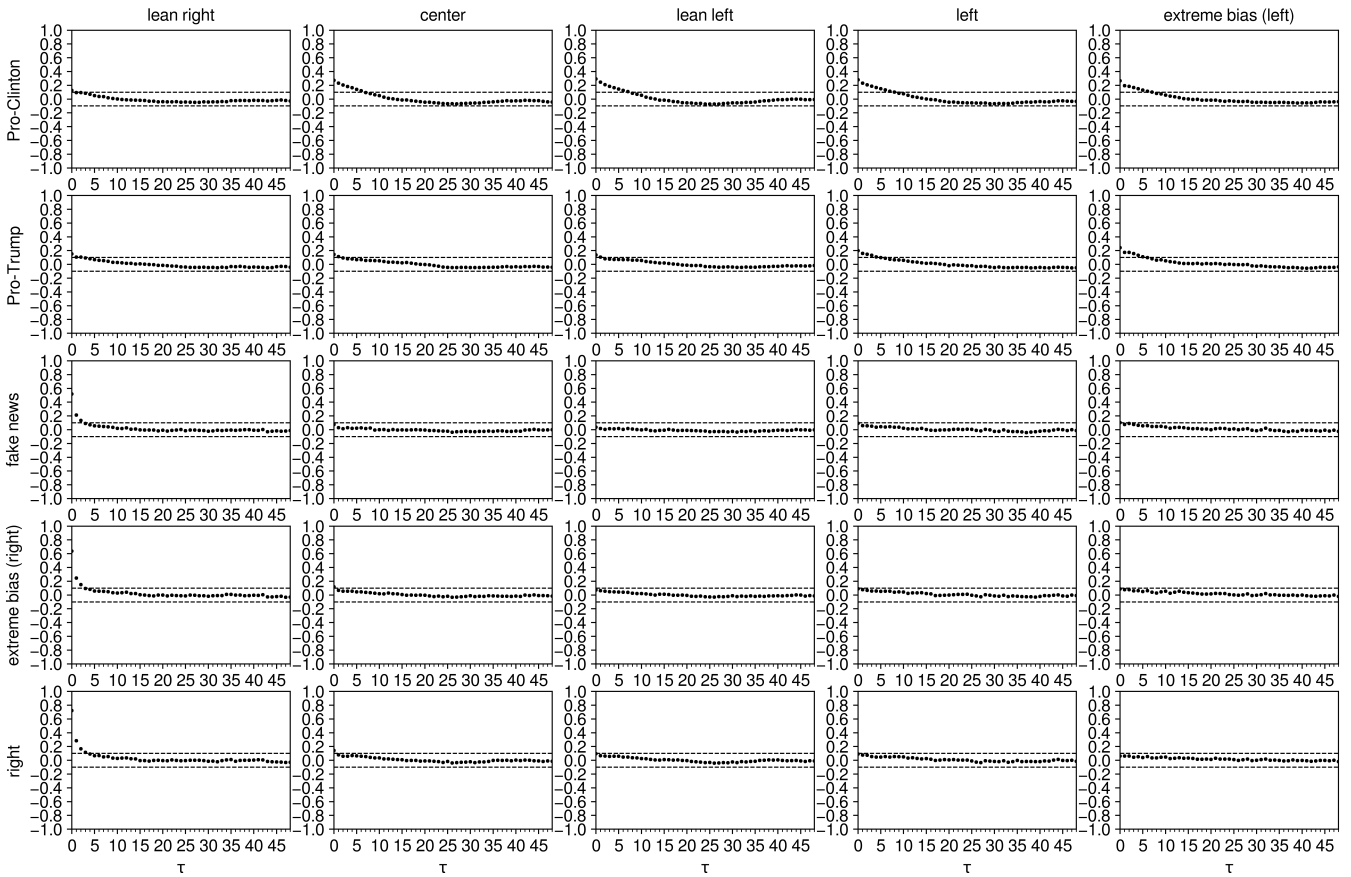

Supplementary Figure 10: Pairwise lagged correlations between the activity time series of top 100 influencers of fake, extreme bias (right), right leaning, center, left leaning, left and extreme bias (left) news as well as and Trump and Clinton supporters. The time lag,  $\tau$ , is expressed in data time points corresponding to 15 min interval. The horizontal dashed line represents a correlation value of 0.1 and -0.1.

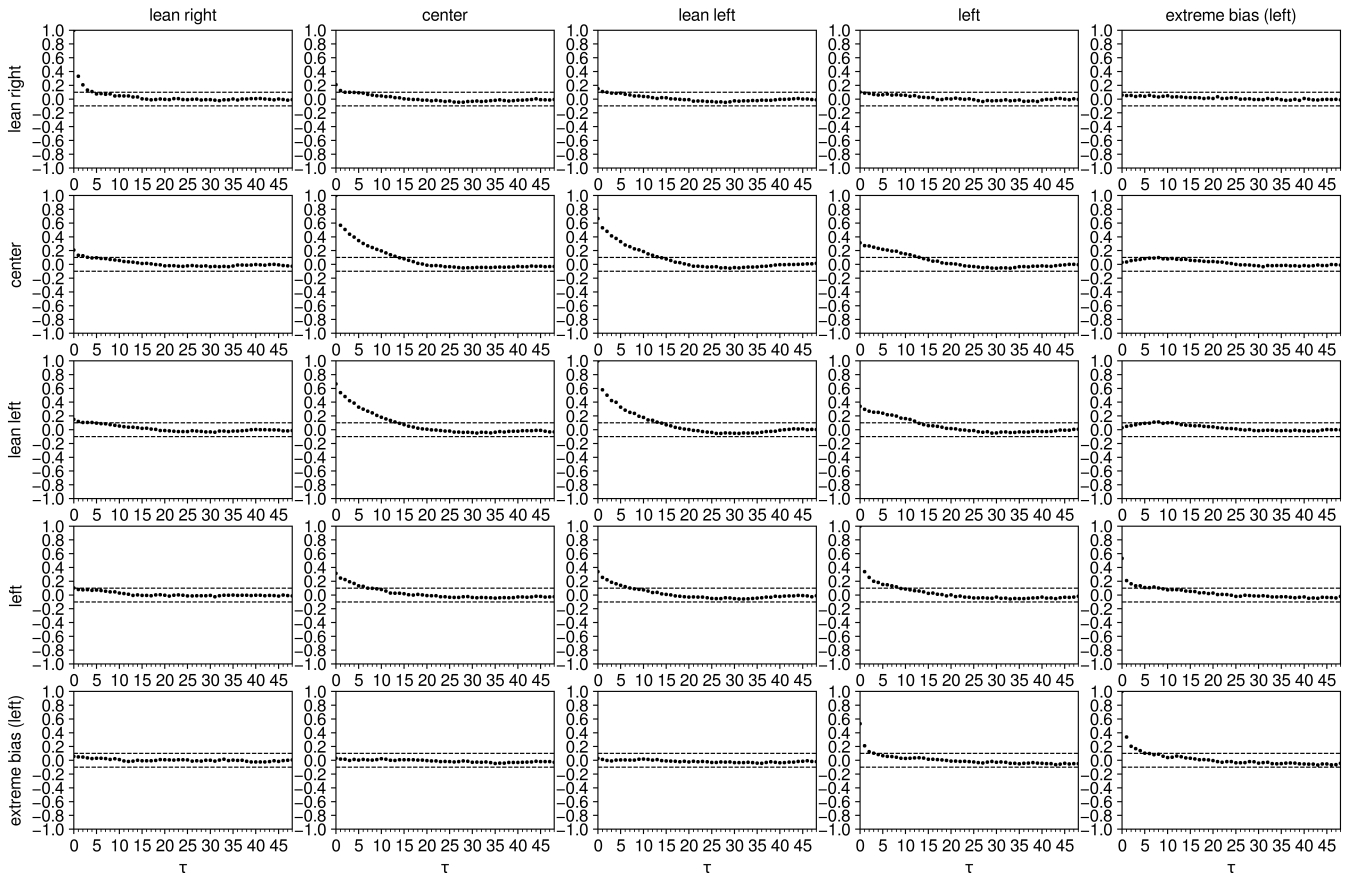

**Supplementary Figure 11: Pairwise lagged correlations between the activity time series of top 100 influencers of right leaning, center, left leaning, left and extreme bias (left) news.** The time lag,  $\tau$ , is expressed in data time points corresponding to 15 min interval. The horizontal dashed lines represents a correlation value of 0.1 and -0.1.

## Supplementary References

- [1] Bakshy, E., Messing, S. & Adamic, L. A. Exposure to ideologically diverse news and opinion on Facebook. *Science* **348**, 1130–1132 (2015). <http://www.sciencemag.org/cgi/doi/10.1126/science.aaa1160>.
